# Supplementary material for: A lamellar structure zeolite LTA for CO2 capture
Source: Royal Society of Chemistry journal article supplement (doi:10.1039/d1nj05908d), 2022-01-01
Supplement: d1nj05908d5.pdf [file d1nj05908d5.pdf]

(Supplementary information)

## **A lamellar structure zeolite LTA for CO<sub>2</sub> capture**

Jie Shen<sup>a</sup>, Qi Sun<sup>a,\*</sup>, Jun Cao<sup>b</sup>, Peng Wang<sup>c</sup>, Weilin Jia<sup>a</sup>, Suyang Wang<sup>a</sup>, Ping Zhao<sup>d</sup>, Zepeng Wang<sup>d</sup>

<sup>a</sup>*College of Materials and Metallurgy, Guizhou University, Guiyang, 550025, China*

<sup>b</sup>*College of Materials Science and Chemistry, China University of Geosciences, Wuhan, 430074, China*

<sup>c</sup>*College of Optical and Electronic Information, Huazhong University of Science and Technology,*

*Wuhan, 430074, China*

<sup>d</sup>*Geological Brigade 105, Bureau of Geology and Mineral Exploration and Development of Guizhou*

*Province, Guiyang, 550018, China*

\* Corresponding author: [qsun@gzu.edu.cn](mailto:qsun@gzu.edu.cn)

## Contents:

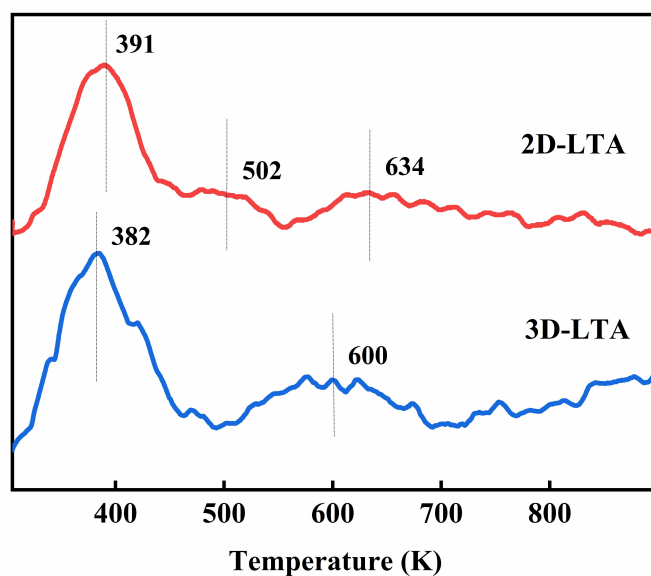

Fig. S1. The NH<sub>3</sub>-TPD of 2D and 3D zeolite.

There were many solid acid centers on the surface of the zeolites after calcination, such as Brønsted and Lewis acid.<sup>46</sup> These solid acid centers were actually the active sites of the zeolites and the acid strength was tested by NH<sub>3</sub>-TPD. The active sites of zeolite were usually distributed on the trivalent Al<sup>3+</sup> inside the skeleton. The advantage of the 2D zeolite LTA with a large specific surface area compared to 3D zeolite was that the skeleton aluminum ions were more easily exposed to the surface, resulting in more active sites.

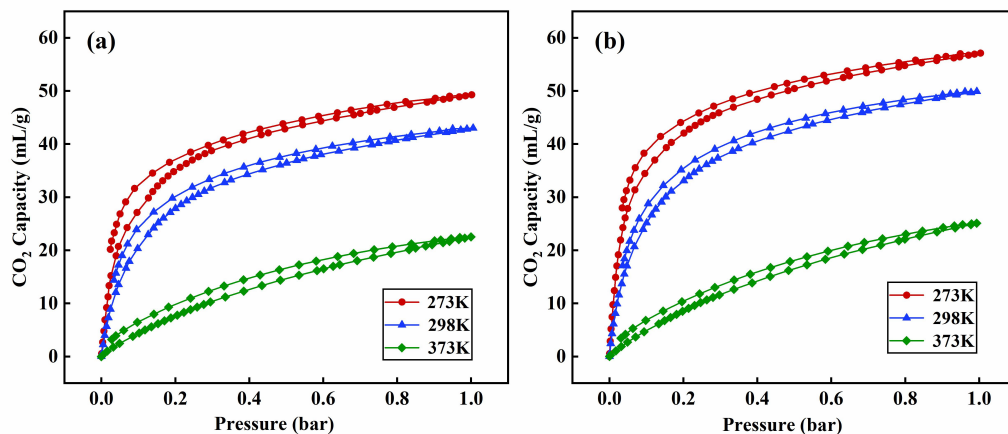

Fig. S2. CO<sub>2</sub> adsorption-desorption isotherms of the zeolites with (a)3D, (b)2D.

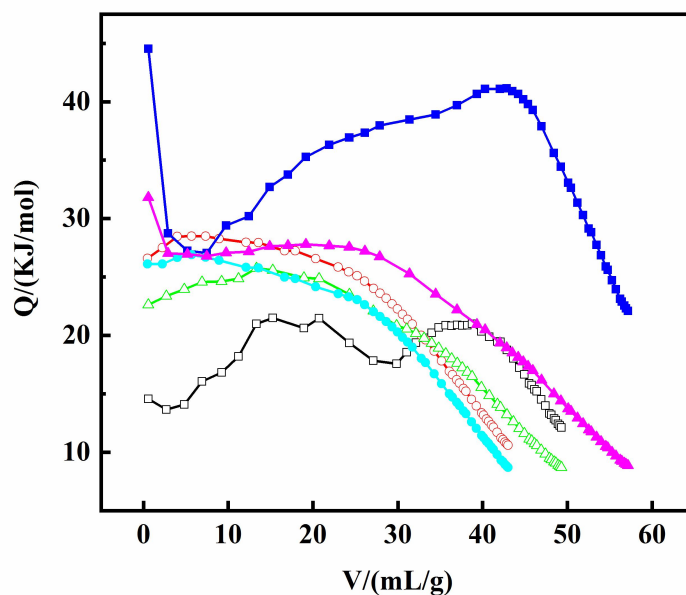

Fig. S3. Heat of adsorption of zeolites. Closed symbol: 2D-LTA; open symbol: 3D-LTA. (Square: 273-298 K; triangle: 298-373 K; circular:273-373 K)

The heat of adsorption was calculated by Clausius-Clapeyron equation:

$$Q = \frac{RT_1T_2 \ln(P_2/P_1)}{T_2 - T_1}$$

Where Q is heat of adsorption, KJ/mol; R is gas constant, 8.314J/mol; T is adsorption temperature, K; P is adsorption pressure, bar.

Table S1. Comparison of CO<sub>2</sub> and CO<sub>2</sub>/CH<sub>4</sub> selectivity with different materials.

| Sample            | Temperature<br>/K | CO <sub>2</sub> Capacity<br>/mmol·g <sup>-1</sup> | CO <sub>2</sub> /CH <sub>4</sub><br>Selectivity | Reference |
|-------------------|-------------------|---------------------------------------------------|-------------------------------------------------|-----------|
| 2D-LTA            | 273               | 2.55 <sup>a</sup>                                 | -                                               | This work |
|                   | 298               | 2.23 <sup>a</sup>                                 | 76.76                                           | This work |
| 3D-LTA            | 273               | 2.20 <sup>a</sup>                                 | -                                               | This work |
|                   | 298               | 1.92 <sup>a</sup>                                 | 5.93                                            | This work |
| ZIF-68            | 298               | 1.68                                              | 5.0                                             | 9         |
| ZIF-69            | 273               | 1.81                                              | 5.1                                             | 9         |
| ZIF-70            | 298               | 2.45                                              | 5.2                                             | 9         |
| ZIF-78            | 298               | 2.30                                              | 10.6                                            | 9         |
| ZIF-79            | 298               | 1.49                                              | 5.4                                             | 9         |
| ZIF-81            | 298               | 1.70                                              | 5.7                                             | 9         |
| ZIF-82            | 298               | 2.35                                              | 9.6                                             | 9         |
| NaA-RS            | 273               | 2.26                                              | -                                               | 10        |
|                   | 303               | 1.15                                              | -                                               | 10        |
|                   | 333               | 0.53                                              | -                                               | 10        |
| TEPA-ZSM-5        | 298               | 0.15                                              | -                                               | 11        |
| TEPA-ZY           | 298               | 1.12                                              | -                                               | 11        |
| TEPA-SAOP-34      | 298               | 0.45                                              | -                                               | 11        |
| NaA               | 273               | 3.5                                               | -                                               | 12        |
|                   | 298               | 3.1                                               | -                                               | 12        |
| 5A                | 293               | 1.86                                              | 24.9                                            | 13        |
| SAPO-34           | 303               | 2.4 <sup>b</sup>                                  | 3.8                                             | 14        |
| ZSM-5             | 303               | 1.5 <sup>b</sup>                                  | 2.4                                             | 14        |
| K-ETS-10          | 298               | 2.53                                              | 52.5                                            | 15        |
| As-synthesized-10 | 298               | 2.01                                              | 49.6                                            | 15        |
| PEHA/CDMC         | 373               | 3.72                                              | -                                               | 16        |
|                   | 298               | 2.50                                              | -                                               | 16        |

<sup>a</sup>  $(x \text{ mL} \cdot \text{g}^{-1}) / (22.4 \text{ L} \cdot \text{mol}^{-1}) = y \text{ mmol} \cdot \text{g}^{-1}$

<sup>b</sup> P=2bar
