# Supplementary figures and images for: A lamellar structure zeolite LTA for CO2 capture
Source: Royal Society of Chemistry journal article supplement (doi:10.1039/d1nj05908d), 2022-01-01

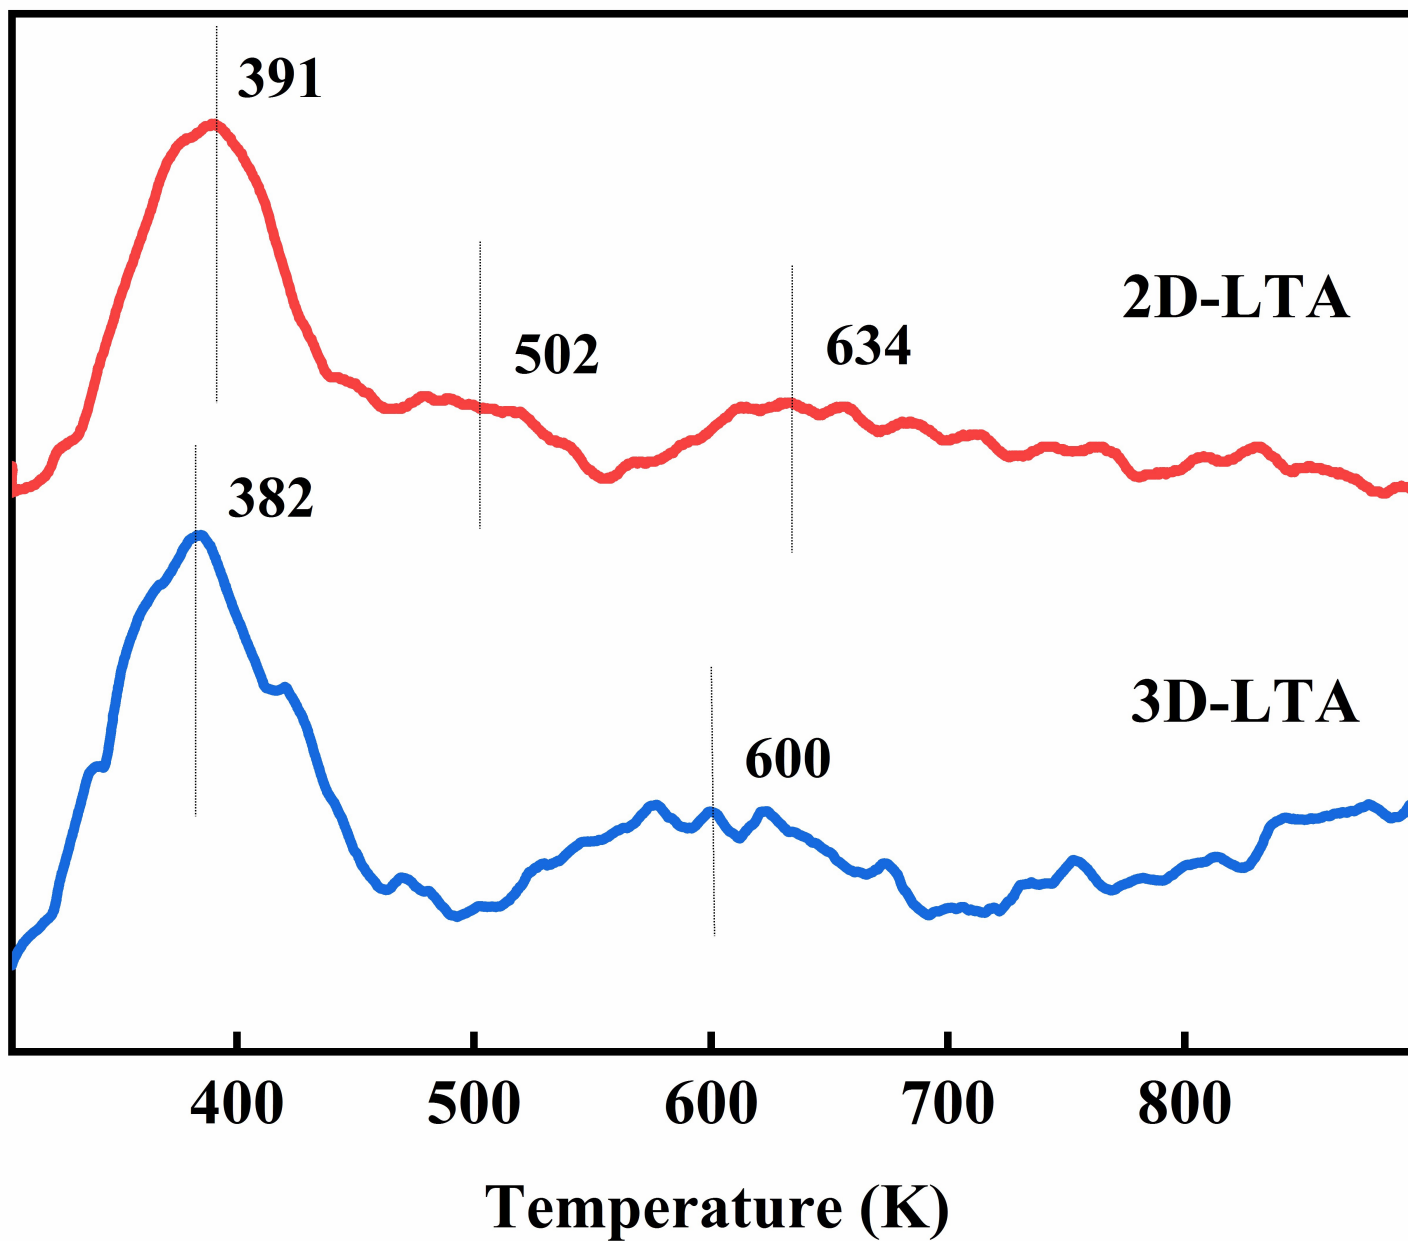

Supplement: d1nj05908d2.pdf [file d1nj05908d2.pdf]

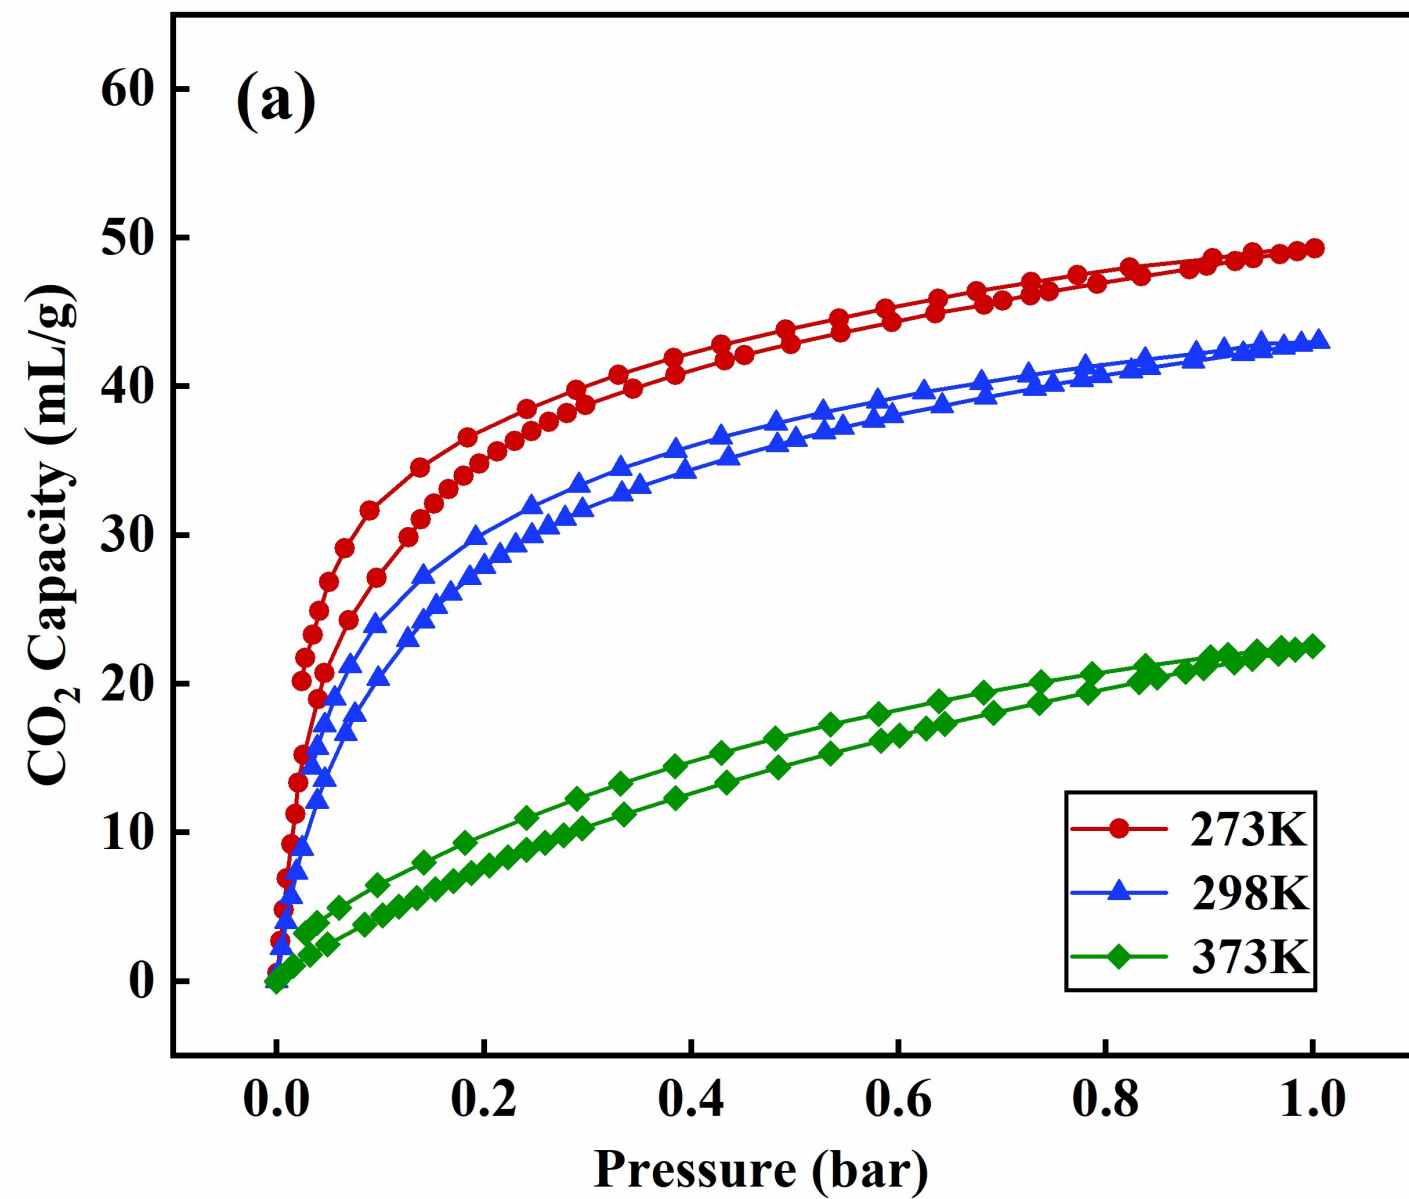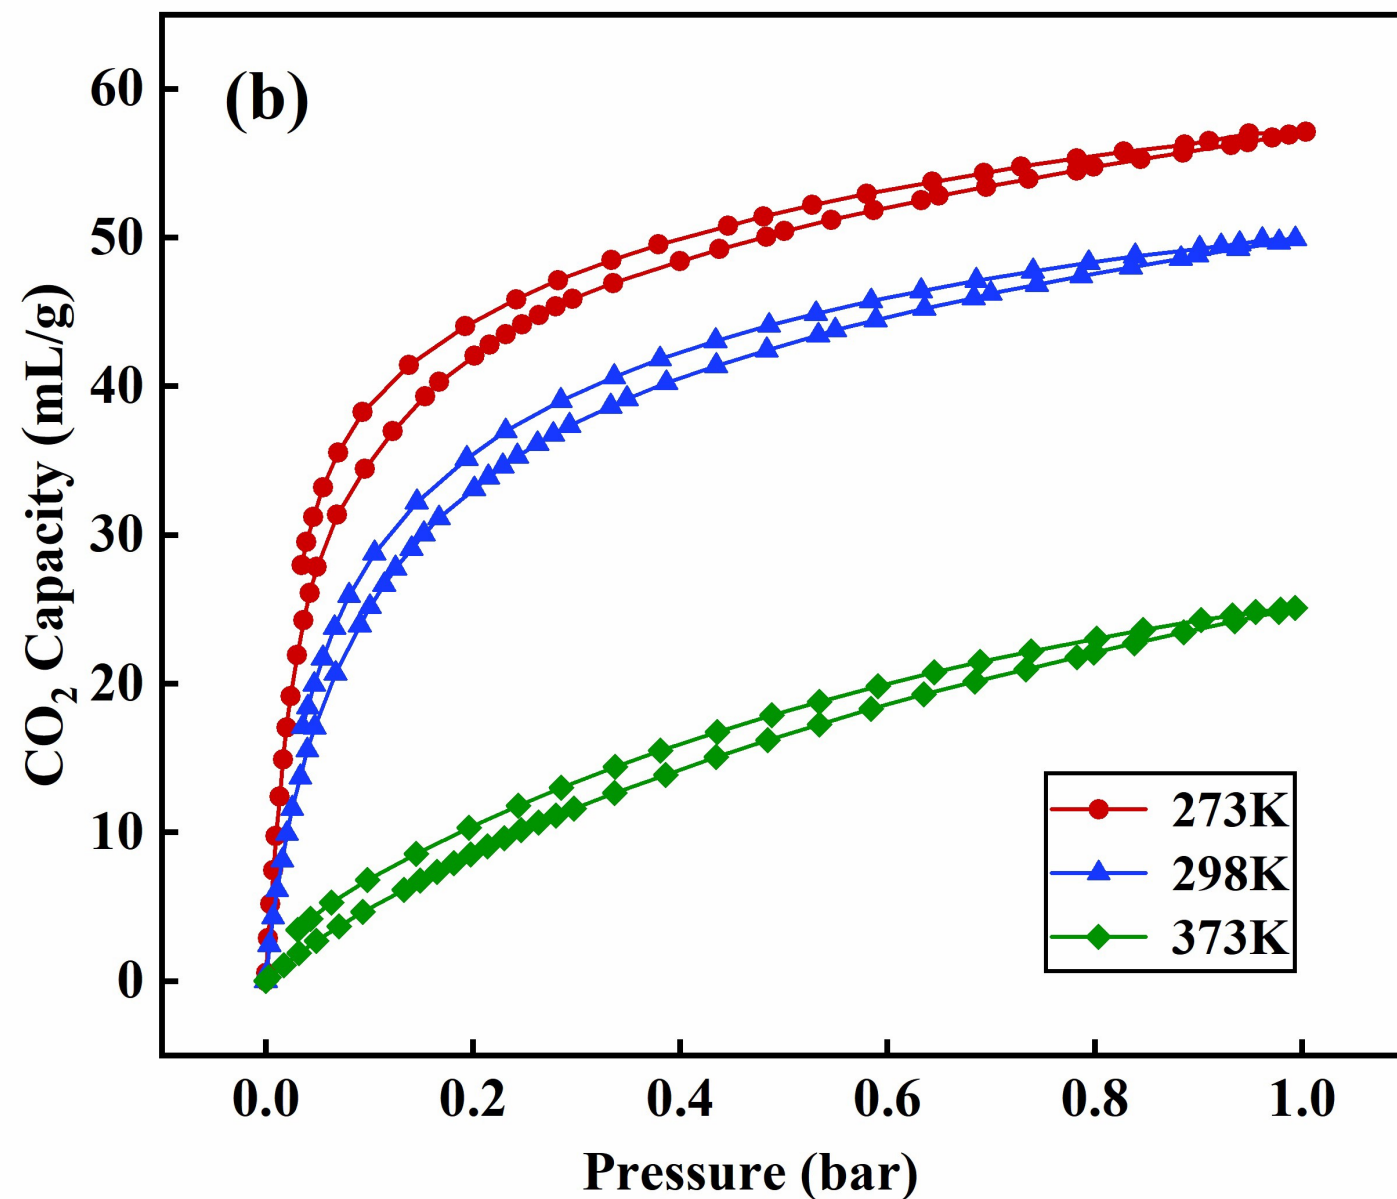

Supplement: d1nj05908d3.pdf [file d1nj05908d3.pdf]

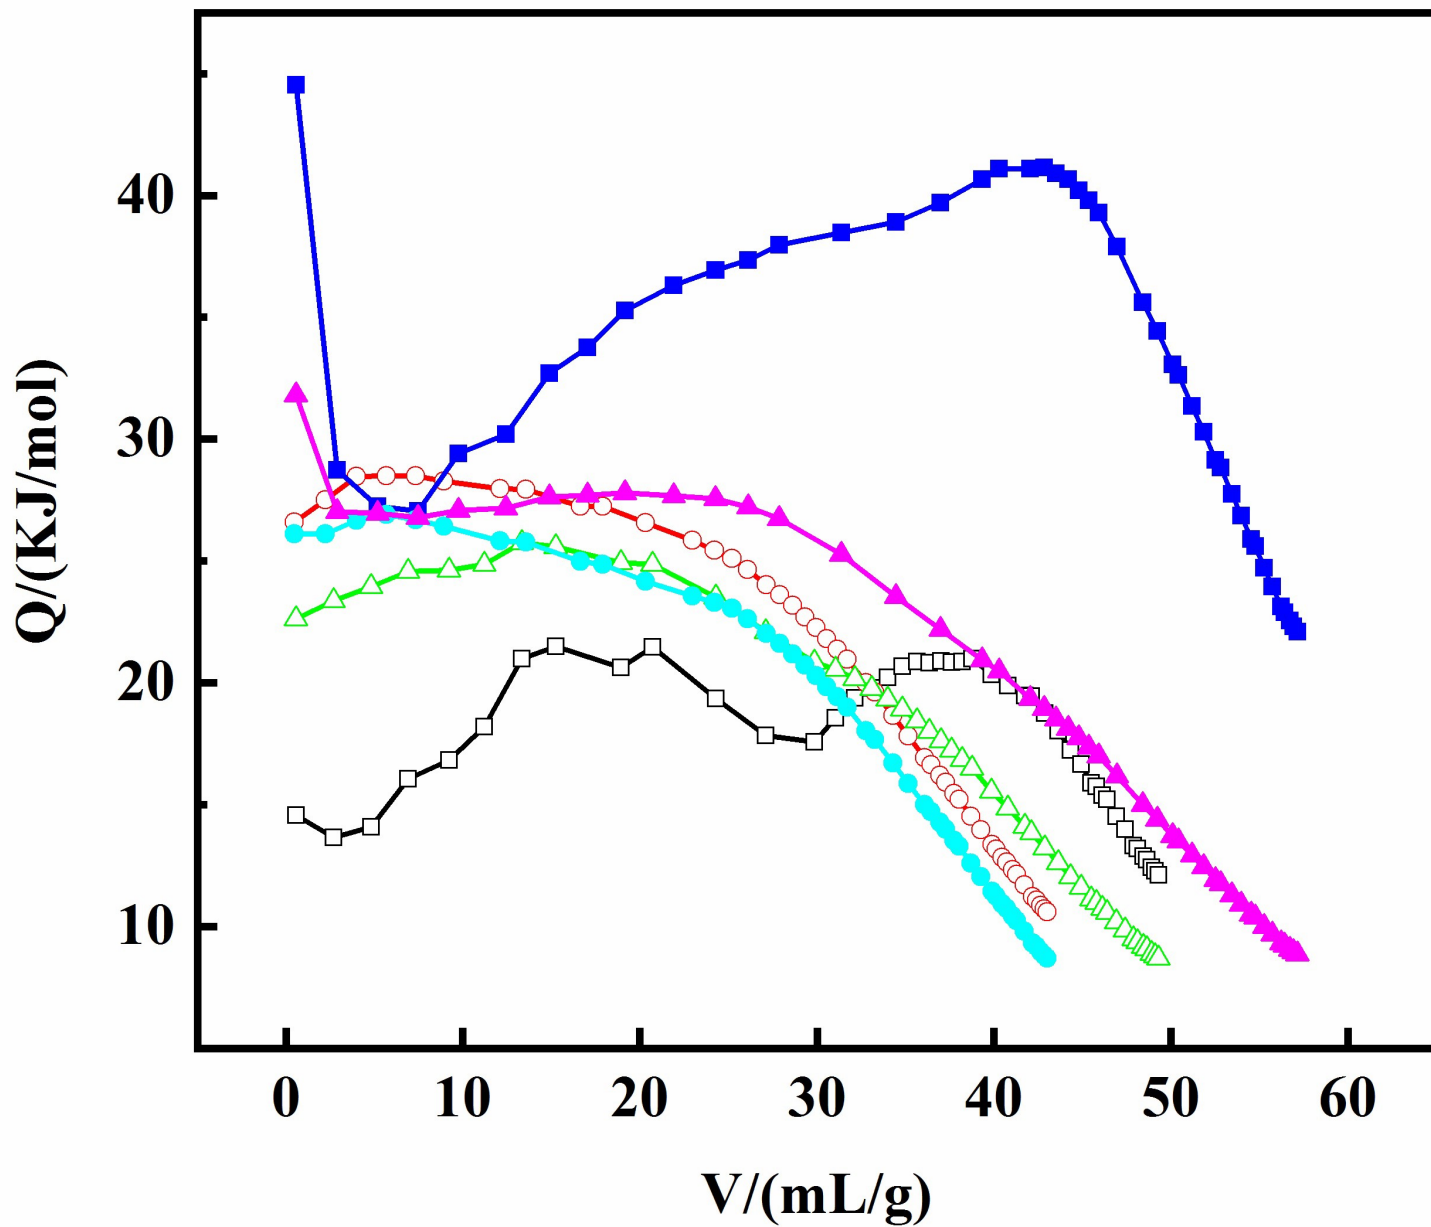

Supplement: d1nj05908d4.pdf [file d1nj05908d4.pdf]
